# Supplementary material for: Computerized clinical decision support systems for therapeutic drug monitoring and dosing: A decision-maker-researcher partnership systematic review
Source: Springer Nature journal article supplement (doi:10.1186/1748-5908-6-90), 2011-08-03

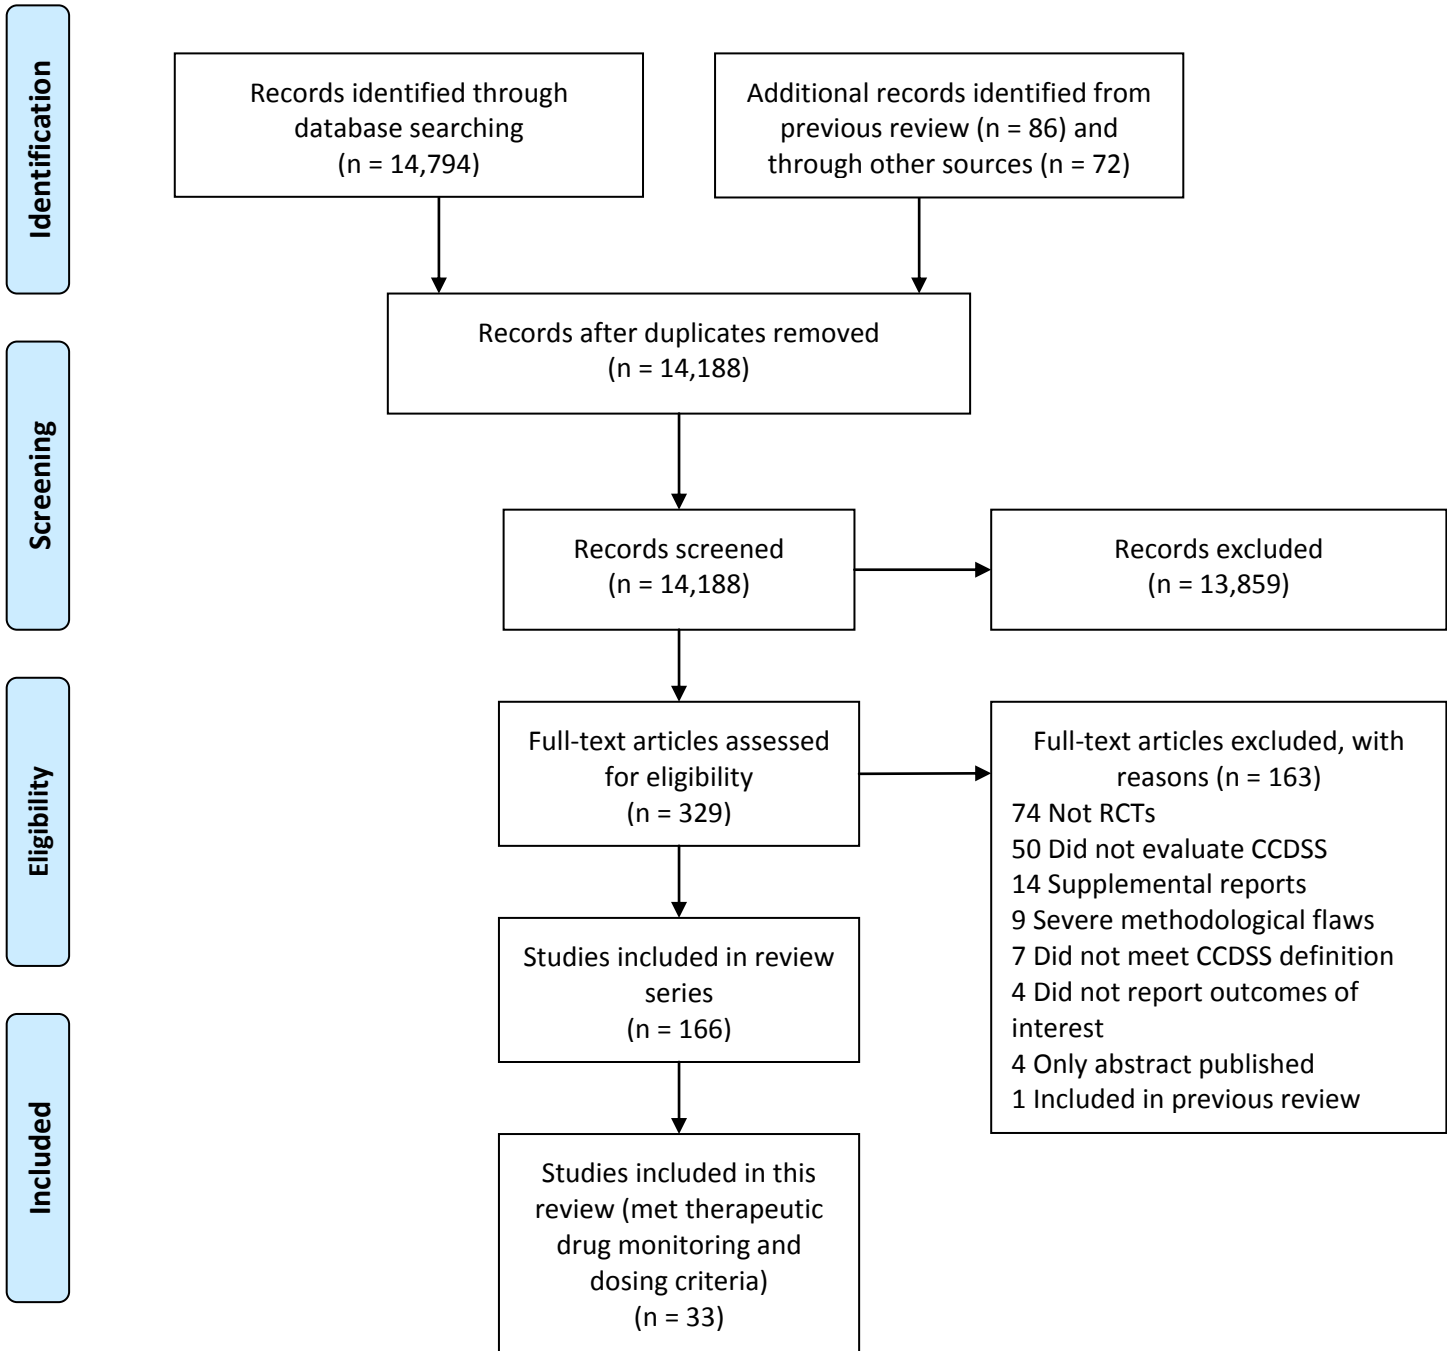

Supplement: 13012_2011_401_MOESM6_ESM.pdf [file 13012_2011_401_MOESM6_ESM.pdf]
